# Supplementary material for: FER kinase promotes breast cancer metastasis by regulating α6- and β1-integrin-dependent cell adhesion and anoikis resistance
Source: PubMed Central journal article supplement — Oncogene. 2013 Jul 22;32(50):5582–92. doi: 10.1038/onc.2013.277 (PMC3898493; doi:10.1038/onc.2013.277), 2013-07-22
Supplement: onc2013277x3.pdf [file onc2013277x3.pdf]

A

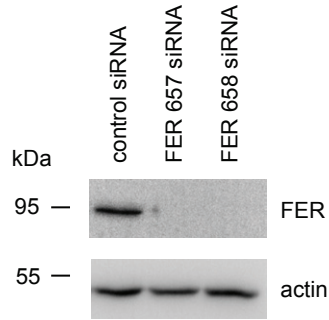

B

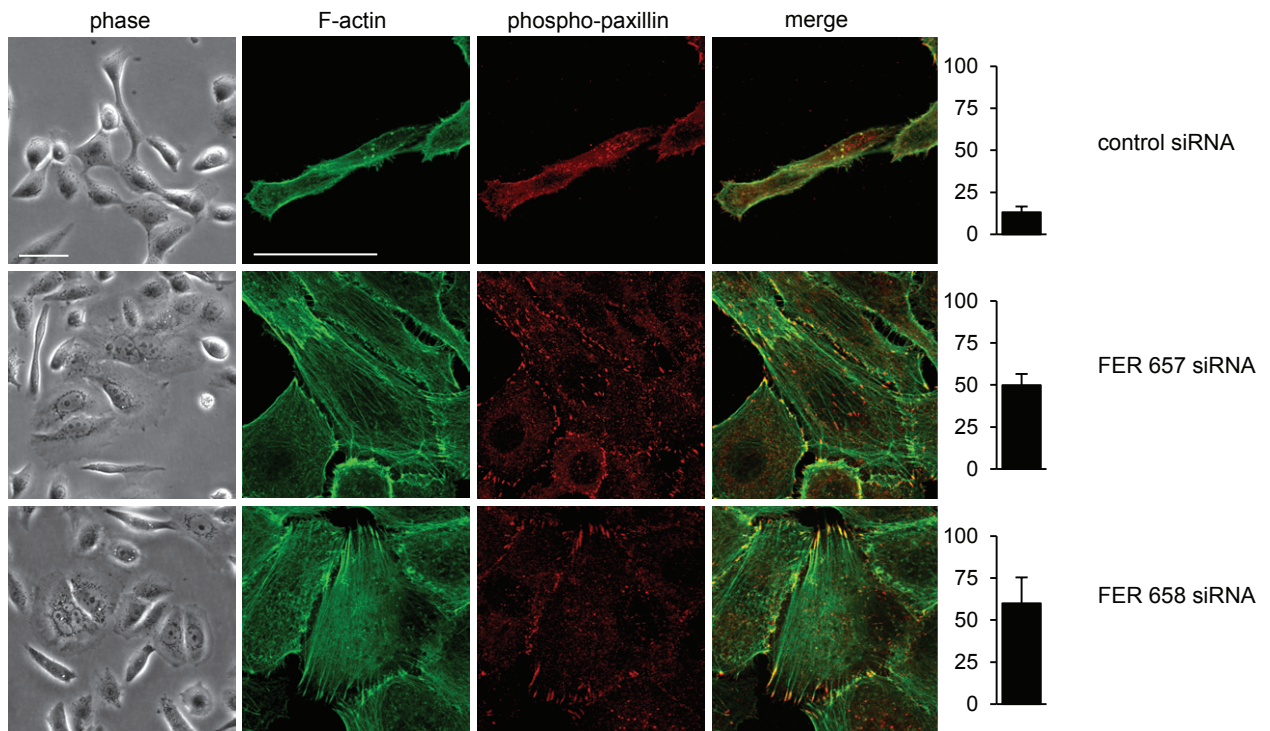

**Supplementary Figure 1. Inhibition of FER induces cell spreading, actin stress fibre and focal adhesion formation in SUM149PT cells.**

(A) Knock-down (KD) of FER in SUM149PT cells using siRNA transfection. FER expression was analysed by immunoblot 72 h post-transfection. Actin was used as a loading control. (B) FER KD induces changes in cell morphology. Control and FER KD SUM149PT cells were plated on collagen I-coated glass coverslips. Live cell morphology was analysed by phase contrast microscopy (phase). F-actin (green) and phospho-paxillin (red) distribution was analysed in fixed cells by immunofluorescence microscopy. Scale bar = 50  $\mu$ m. The graphs show the number of cells with prominent actin stress fibres (% total  $\pm$  SD). The results shown are representative of three independent experiments.
