# Supplementary material for: FER kinase promotes breast cancer metastasis by regulating α6- and β1-integrin-dependent cell adhesion and anoikis resistance
Source: PubMed Central journal article supplement — Oncogene. 2013 Jul 22;32(50):5582–92. doi: 10.1038/onc.2013.277 (PMC3898493; doi:10.1038/onc.2013.277), 2013-07-22
Supplement: onc2013277x5.pdf [file onc2013277x5.pdf]

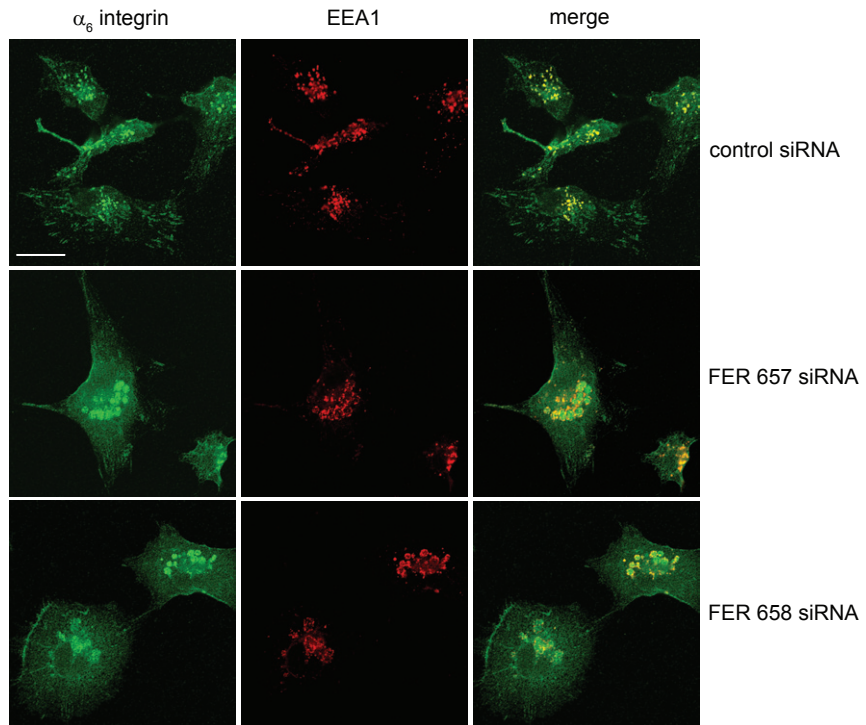

**Supplementary Figure 3. Fer kinase downregulation promotes accumulation of  $\alpha_6$ -integrin in endosomal vesicles.**

MDA-MB-231 cells were transfected with the indicated siRNAs and plated on laminin-coated glass coverslips 72 h later. Cells were processed for immunofluorescence microscopy after 24 h using anti- $\alpha_6$  integrin and anti-early endosome antigen 1 (EEA1) antibodies. Scale bar = 20  $\mu$ m. The results shown are representative of three independent experiments.
