# Supplementary material for: FER kinase promotes breast cancer metastasis by regulating α6- and β1-integrin-dependent cell adhesion and anoikis resistance
Source: PubMed Central journal article supplement — Oncogene. 2013 Jul 22;32(50):5582–92. doi: 10.1038/onc.2013.277 (PMC3898493; doi:10.1038/onc.2013.277), 2013-07-22
Supplement: onc2013277x7.pdf [file onc2013277x7.pdf]

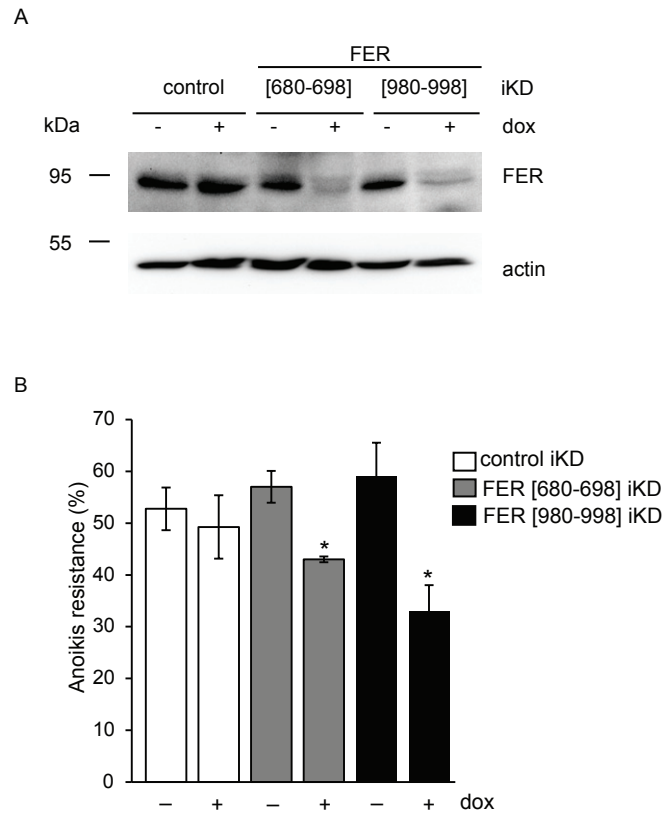

**Supplementary Figure 5. FER kinase regulates anoikis resistance in SUM149PT breast cancer cells.**

(A) *FER* inducible knock-down (iKD) in SUM149PT cells. SUM149PT iKD cells were cultured for 96 h in the absence (-) or presence (+) of doxycycline (dox; 2  $\mu$ g/ml) to induce shRNA expression and FER kinase was detected by immunoblot. Actin was used as a loading control. (B) *FER* confers anoikis resistance to SUM149PT cells. Adherent cultures of SUM149PT iKD cells were treated as in (A). Cells were trypsinized and cultured in suspension conditions for 72 h in the absence or presence of dox (2  $\mu$ g/ml), followed by labelling with Cy5-conjugated Annexin-V and propidium iodide (PI) and FACS analysis. Values represent the percentage of anoikis resistant cells (PI<sup>NEG</sup>/Annexin-V<sup>NEG</sup>)  $\pm$  SEM. \* indicates a significant difference compared to untreated cells (-dox); ( $p < 0.05$ , one-way ANOVA). The results shown are representative of three independent experiments.
