# Supplementary material for: FER kinase promotes breast cancer metastasis by regulating α6- and β1-integrin-dependent cell adhesion and anoikis resistance
Source: PubMed Central journal article supplement — Oncogene. 2013 Jul 22;32(50):5582–92. doi: 10.1038/onc.2013.277 (PMC3898493; doi:10.1038/onc.2013.277), 2013-07-22
Supplement: onc2013277x8.pdf [file onc2013277x8.pdf]

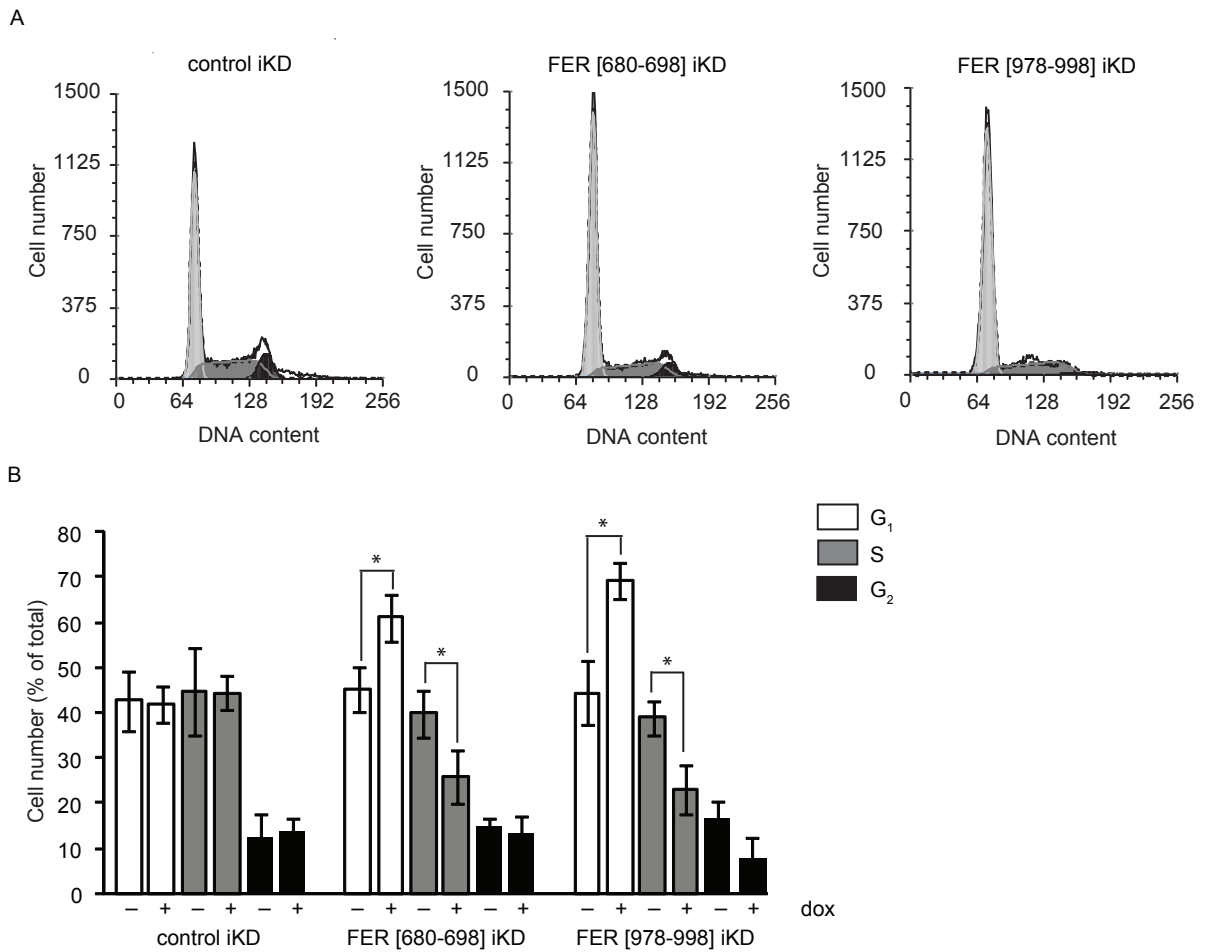

**Supplementary Figure 6. FER downregulation inhibits cell cycle progression.**

MDA-MB-231 inducible knock-down (iKD) cells were cultured for 96 h in the absence (-) or presence (+) of doxycycline (dox; 2 µg/ml) to induce shRNA expression. Cells were collected and fixed in 70% ethanol for 1 h on ice, followed by centrifugation (3000 g, 5 min, room temperature). Pellets were rinsed once with PBS, resuspended in PBS containing 30 µg/ml RNaseA and incubated for 30 min at 37°C. DNA was labelled with ToPro-3 (1:20 000; Invitrogen) and samples were analysed on a FACSCalibur flow cytometer (Becton Dickinson). Cell cycle analysis was performed using FCS Express 4 Flow Cytometry software (De Novo Software).

(A) FACS histograms of iKD cells (+ dox). (B) Quantification of cell cycle distribution of iKD cells. Values represent the relative number of cells ± SEM. \* p<0.05 Two-tailed Student's t test.
